# Supplementary material for: Physcion-Matured Dendritic Cells Induce the Differentiation of Th1 Cells
Source: MDPI journal article supplement (doi:10.3390/ijms21051753), 2020-03-04
Supplement: s1 [file s1]

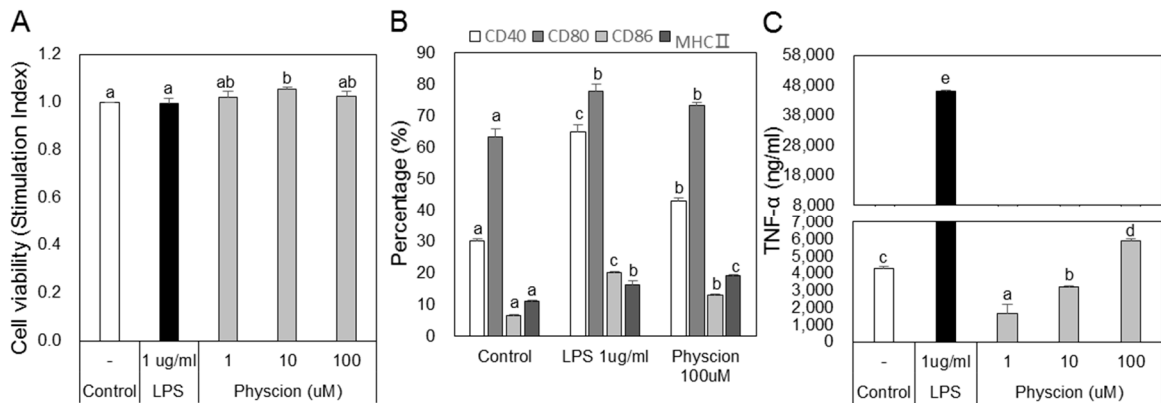

**Supp. 1.** Physcion increased surface molecule expressions and cytokines production in RAW264.7 macrophages. (A) Cell viability was assessed using CCK-8. (B) CD40, CD80, CD86, and MHC II expressions in RAW 264.7 cells were assessed by FACS. (C) TNF- $\alpha$  levels in supernatants were determined by ELISA. Experiments were repeated twice. a, b, c, d, and e: different letters indicate significant differences ( $p < 0.05$ ) as measured by one-way ANOVA with Duncan's multiple-range test.

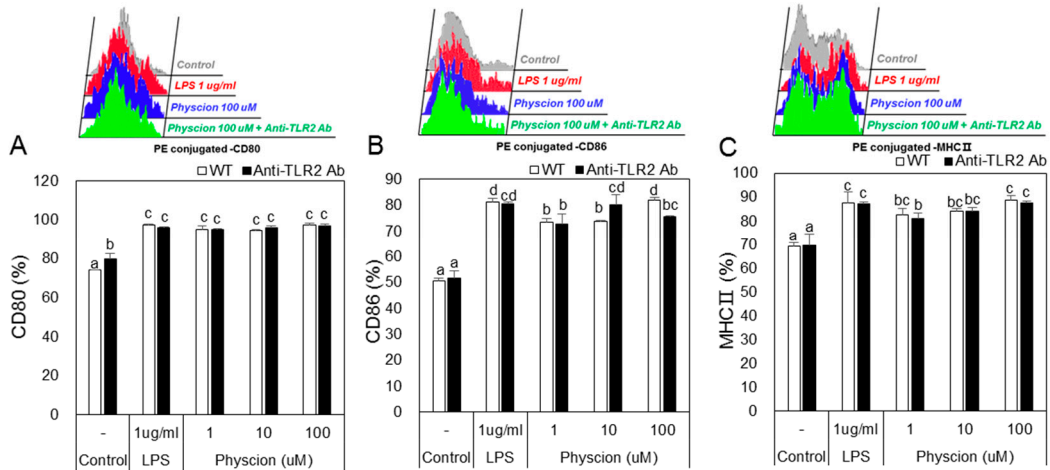

**Supp. 2.** Blocking TLR2 did not affect BMDC surface molecule expression. (A) Percentages of CD11c<sup>+</sup> CD80<sup>+</sup> cells, (B) CD11c<sup>+</sup>CD86<sup>+</sup> cells, (C) CD11c<sup>+</sup>MHC II<sup>+</sup> cells from anti-TLR2 Ab treated or untreated BMDCs were measured by flow cytometry. Experiments were repeated twice. a, b, c, and d: different letters indicate significant differences ( $p < 0.05$ ) as measured by one-way ANOVA with Duncan's multiple-range test.
